# Supplementary material for: Self-supported nickel phosphosulphide nanosheets for highly efficient and stable overall water splitting
Source: Royal Society of Chemistry journal article supplement (doi:10.1039/c7ta02651j), 2017-01-01
Supplement: c7ta02651j1.pdf [file c7ta02651j1.pdf]

## Supporting Information

### **Self-Supported Nickel Phosphosulphide Nanosheets for Highly Efficient and Stable Overall Water Splitting**

Jie Luo<sup>a,\*</sup>, Haiyan Wang<sup>a</sup>, Geng Su<sup>a,\*</sup>, Yuliang Tang<sup>a</sup>, Huangqing Liu<sup>b</sup>, Fenyang  
Tian<sup>a</sup>, Deliang Li<sup>a</sup>

<sup>a</sup> School of Materials Science and Engineering, Central South University of  
Forestry and Technology, Changsha, Hunan 410004, PR China

<sup>b</sup> School of Physics and Electronics, Hunan University, Changsha, Hunan  
410082, PR China

\*Corresponding author. E-mail: [clxy\\_luojie@csuft.edu.cn](mailto:clxy_luojie@csuft.edu.cn)

[sugeng1996@126.com](mailto:sugeng1996@126.com)

## Supplementary results

**Table S1.** Elemental composition of Ni, P, and S in as-prepared and post-reaction  $\text{NiP}_{0.62}\text{S}_{0.38}$ , from ICP-AES and the corresponding BET surface area.

| Electrodes                                         | Composition (wt %) |      |      | Atomic ratio | BET ( $\text{m}^2/\text{g}$ ) |
|----------------------------------------------------|--------------------|------|------|--------------|-------------------------------|
|                                                    | Ni                 | P    | S    | Ni:P:S       |                               |
| $\text{NiP}_{0.62}\text{S}_{0.38}$ (fresh)         | 65.1               | 21.3 | 13.4 | 1:0.62:0.38  | 198                           |
| $\text{NiP}_{0.62}\text{S}_{0.38}$ (6 h after HER) | 64.7               | 20.1 | 12.2 | 1:0.58:0.35  | 195                           |
| $\text{NiP}_{0.62}\text{S}_{0.38}$ (6 h after OER) | 64.2               | 17.6 | 10.4 | 1:0.52:0.30  | 208                           |

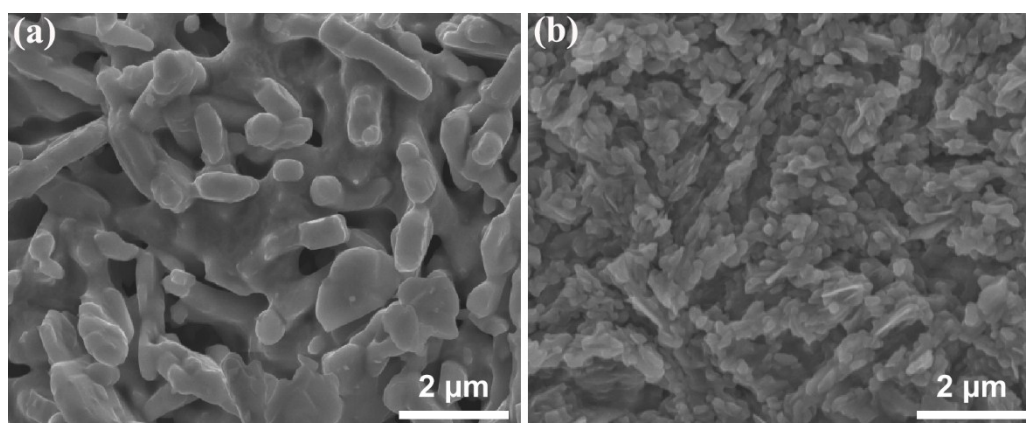

**Fig. S1** Top-view SEM images of NiP and NiS.

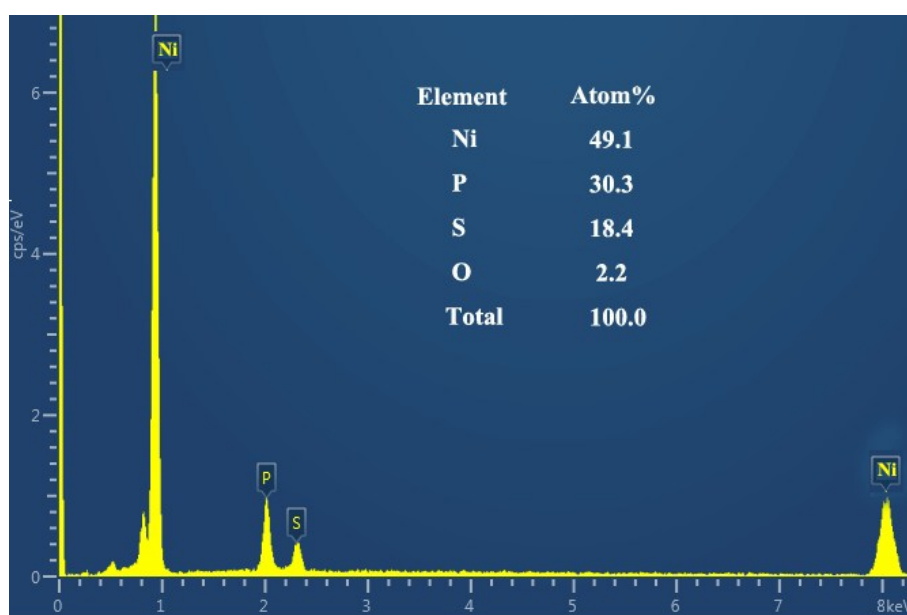

**Fig. S2** EDS spectrum of  $\text{NiP}_{0.62}\text{S}_{0.38}$  and the atomic ratio of corresponding elements.

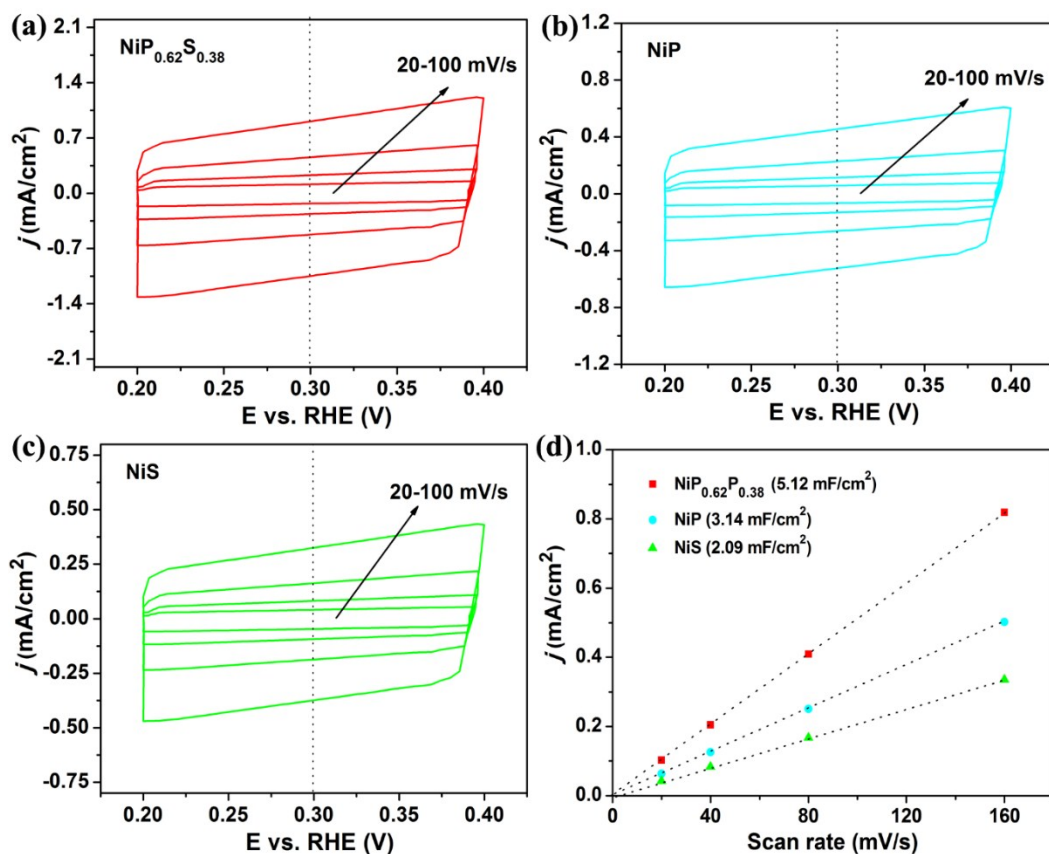

**Fig. S3** Electrochemical capacitance measurements to determine the ECSA of the obtained electrodes in 1 M KOH for HER. The capacitive current density on (a)  $\text{NiP}_{0.62}\text{S}_{0.38}$ , (b)  $\text{NiP}$ , and (c)  $\text{NiS}$  can be measured from cyclic voltammograms in a potential range of 0.2-0.4 V vs. RHE where no Faradic reaction occur. (d) The measured capacitive current plotted as a function of scan rate.

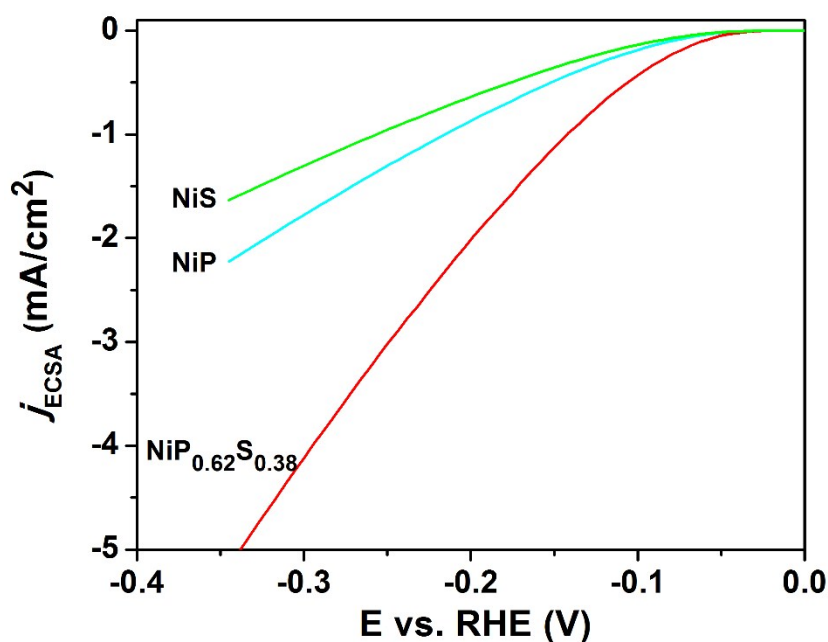

Fig. S4 Polarization curves with current density normalized by ECSA for  $\text{NiP}_{0.62}\text{S}_{0.38}$ , NiP and NiS.

#### Electrochemical active surface area and TOF calculation

Electrochemical capacitance measurements were used to determine the active surface area of the obtained catalysts, which is similar to the previous report [1]. The applied potential was kept between 0.2 to 0.4 V vs. RHE for four cycles at different scan rates (20, 40, 80, and 160 mV/s). The capacitive currents were measured in a potential range where no faradic reactions occurring and then obtain the current data at the middle potential value (0.3 V vs. RHE). Fig. S2c shows the measured capacitive currents were plotted as a function of scan rate, and the specific capacitance are determined to be about 5.12, 3.14, and 2.09  $\mu\text{F}/\text{cm}^2$  for  $\text{NiP}_{0.62}\text{S}_{0.38}$ , NiP, and NiS, respectively. In general, the specific capacitance for a flat surface is found to be in the range of 20-60  $\mu\text{F}/\text{cm}^2$ , and we adopt the middle value of 40  $\mu\text{F}/\text{cm}^2$  to calculate the turnover frequency (TOF).

$$A_{\text{ECSA}}(\text{NiP}_{0.62}\text{S}_{0.38}) = \frac{\text{Total specific capacitance of NiP}_{0.62}\text{S}_{0.38}}{\text{specific capacitance of per real surface area}} = \frac{5.12 \text{ mF}/\text{cm}^2}{40 \mu\text{F}/\text{cm}^2 \text{ per ECSA cm}^2} = 128.0 \text{ cm}_{\text{ECSA}}^2$$

$$A_{\text{ECSA}}(\text{NiP}) = \frac{\text{Total specific capacitance of NiP}}{\text{specific capacitance of per real surface area}} = \frac{3.14 \text{ mF}/\text{cm}^2}{40 \mu\text{F}/\text{cm}^2 \text{ per ECSA cm}^2} = 78.5 \text{ cm}_{\text{EASA}}^2$$

$$A_{ECSA (NiS)} = \frac{\text{Total specific capacitance of NiS}}{\text{specific capacitance of per real surface area}} = \frac{2.09 \text{ mF/cm}^2}{40 \text{ } \mu\text{F/cm}^2 \text{ per ECSA cm}^2} = 52.3 \text{ cm}_{ECSA}^2$$

$$n_{H_2} = \left( j \frac{\text{mA}}{\text{cm}^2} \right) \left( \frac{1 \text{ C} \cdot \text{s}^{-1}}{1000 \text{ mA}} \right) \left( \frac{1 \text{ mol } e^-}{96485.3 \text{ C}} \right) \left( \frac{1 \text{ mol } H_2}{2 \text{ mol } e^-} \right) \left( \frac{6.022 \times 10^{23} H_2 \text{ molecules}}{1 \text{ mol } H_2} \right) = 3.12 \times 10^{15} \frac{H_2/s}{\text{cm}^2} \text{ per } \frac{\text{mA}}{\text{cm}^2}$$

We conservatively estimate the number of active sites as the total number of surface sites (including both the nickel, phosphide, and sulfide atoms) because the exact hydrogen binding sites are not known. The volume of each cell for  $\text{NiP}_{0.62}\text{S}_{0.38}$ ,  $\text{NiP}$ , and  $\text{NiS}$  is 89.88, 89.67 and 54.83  $\text{\AA}^3$ , respectively, thus

$$n_{\text{NiP}_{0.62}\text{S}_{0.38}}^{\text{surface sites}} = \left( \frac{16 \text{ atoms per unit cell}}{89.88 \text{ } \text{\AA}^3 \text{ per unit cell}} \right)^{\frac{2}{3}} = 3.164 \times 10^{15} \text{ atoms per real cm}^2$$

$$n_{\text{NiP}}^{\text{surface sites}} = \left( \frac{16 \text{ atoms per unit cell}}{89.67 \text{ } \text{\AA}^3 \text{ per unit cell}} \right)^{\frac{2}{3}} = 3.168 \times 10^{15} \text{ atoms per real cm}^2$$

$$n_{\text{NiS}}^{\text{surface sites}} = \left( \frac{4 \text{ atoms per unit cell}}{54.83 \text{ } \text{\AA}^3 \text{ per unit cell}} \right)^{\frac{2}{3}} = 1.746 \times 10^{15} \text{ atoms per real cm}^2$$

Finally, plot of current density can be converted into a TOF plot according to:

$$TOF_{\text{NiP}_{0.62}\text{S}_{0.38}} = \frac{\left( 3.12 \times 10^{15} \frac{H_2/s}{\text{cm}^2} \text{ per } \frac{\text{mA}}{\text{cm}^2} \right) \times |j_{\text{NiP}_{0.62}\text{S}_{0.38}}|}{n_{\text{NiP}_{0.62}\text{S}_{0.38}}^{\text{surface sites}} \times A_{ECSA (\text{NiP}_{0.62}\text{S}_{0.38})}} = 0.0077 \times |j_{\text{NiP}_{0.62}\text{S}_{0.38}}|$$

$$TOF_{\text{NiP}} = \frac{\left( 3.12 \times 10^{15} \frac{H_2/s}{\text{cm}^2} \text{ per } \frac{\text{mA}}{\text{cm}^2} \right) \times |j_{\text{NiP}}|}{n_{\text{NiP}}^{\text{surface sites}} \times A_{ECSA (\text{NiP})}} = 0.0125 \times |j_{\text{NiP}}|$$

$$TOF_{\text{NiS}} = \frac{\left( 3.12 \times 10^{15} \frac{H_2/s}{\text{cm}^2} \text{ per } \frac{\text{mA}}{\text{cm}^2} \right) \times |j_{\text{NiS}}|}{n_{\text{NiS}}^{\text{surface sites}} \times A_{ECSA (\text{NiS})}} = 0.0341 \times |j_{\text{NiS}}|$$

### Theoretical computation of free-energy for the HER

All calculations in this study were carried out using the Vienna ab initio simulation package (VASP) [2-4]. We used the PBE functional for the exchange-correlation energy and projector augmented wave (PAW) potentials [5-7]. The kinetic energy cutoff was set to 450

eV. The ionic relaxation was performed until the force on each atom is less than 0.01 eV/Å. The k-points meshes were sampled based on the Monkhorst-Pack method [8]. DFT-D method was used to calculate the adsorption energy, which is an efficient method to approximately account for the long-range vdW interactions [9]. To minimize the undesired interactions between images, a vacuum of at least 15 Å was considered along the z-axis. DFT simulations were based on the experimentally crystal structure of NiP (ICDD: 01-074-1382) and NiS (ICDD: 01-075-0613). The structure of NiP<sub>0.62</sub>S<sub>0.38</sub> and NiP<sub>0.45</sub>S<sub>0.55</sub> were obtained by substituting phosphide atom within the unit cell with S atoms in all possible geometries and selected the most stable ones. Chemisorption was modeled on the NiP, NiS, NiP<sub>0.62</sub>S<sub>0.38</sub>, and NiP<sub>0.45</sub>S<sub>0.55</sub> (122) surfaces. The surfaces were constructed as slab consists of three layers within periodic boundary conditions, separated by a 20 Å vacuum layer. For these calculations, three layers with 2×2×1 k-point mesh was used in the 2×2 super cells for NiP, NiS, NiP<sub>0.62</sub>S<sub>0.38</sub>, and NiP<sub>0.45</sub>S<sub>0.55</sub>.

The HER activity on a specific system can be reflected by the adsorption energy of a single H atom on active sites of the system. The smaller  $\Delta G_{H^*}$  absolute value means the better activity on the HER catalysts. The adsorption free energy was calculated by

$$\Delta G_H = \Delta E_H + \Delta E_{ZPE} - T\Delta S_H$$

where  $\Delta E_{ZPE}$  and  $\Delta S_H$  are the differences in zero point energy and entropy between the H adsorbed state and H<sub>2</sub> in its gas phase. The hydrogen binding energies were calculated by

$$\Delta E_H = E(\text{surf} + H) - E(\text{surf}) - \frac{1}{2}E(H_2)$$

where E(surf + H), E(surf) and E(H<sub>2</sub>) are the total energies of the surfaces with 1 hydrogen atom adsorbed, the pristine surfaces and gas phase hydrogen molecular respectively.

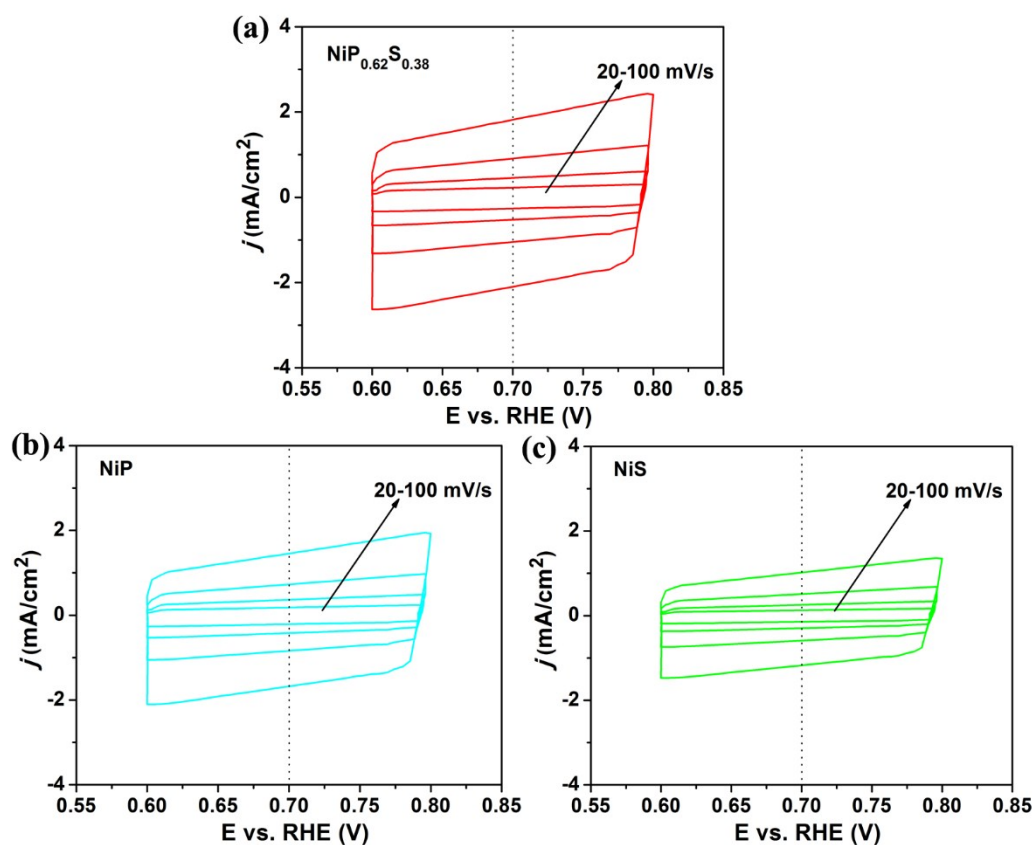

**Fig. S5** Electrochemical capacitance measurements to determine the ECSA of the obtained electrodes in 1 M KOH for OER. The capacitive current density on (a)  $\text{NiP}_{0.62}\text{S}_{0.38}$ , (b)  $\text{NiP}$ , and (c)  $\text{NiS}$  can be measured from cyclic voltammograms in a potential range of 0.6-0.8 V vs. RHE where no Faradic reaction occur.

**Table S2** Comparison of HER activity in alkaline electrolyte (1 M KOH) for NiP<sub>0.62</sub>S<sub>0.38</sub> with other recently reported highly active HER electrocatalysts.

| Catalyst                                             | $\eta_{10}$ (mV) | $\eta_{20}$ (mV) | Tafel slope<br>(mV/dec) | Ref.                                     |
|------------------------------------------------------|------------------|------------------|-------------------------|------------------------------------------|
| NiP <sub>0.62</sub> S <sub>0.38</sub>                | 52               | 70               | 52.3                    | <i>This Work</i>                         |
| Ni <sub>0.51</sub> Co <sub>0.49</sub> P              | 82               |                  | 50.4                    | <i>Adv. Funct. Mater.</i> 2016,26,7644   |
| Ni <sub>5</sub> P <sub>4</sub>                       | 150              |                  | 53                      | <i>Angew. Chem.Int.Ed.</i> 2015,54,12361 |
| CP@Ni-P                                              | 117              | 150              | 85.4                    | <i>Adv.Funct.Mater.</i> 2016,26,4067     |
| Co-P film                                            | 94               | 115              | 42                      | <i>Angew. Chem.Int.Ed.</i> 2015,54,6251. |
| Ni <sub>1-x</sub> Co <sub>x</sub> P                  | 82               |                  | 43                      | <i>Adv. Funct. Mater.</i> 2016,26,7644.  |
| NiCo <sub>2</sub> O <sub>4</sub>                     | 110              |                  | 49.7                    | <i>Angew. Chem.Int.Ed.</i> 2016,55,6290. |
| CoFePO                                               | 87.5             |                  | 38.1                    | <i>ACS Nano</i> 2016,10,8738.            |
| NiCoFe LDHs                                          | 200              |                  | 70                      | <i>ACS Energy Lett.</i> 2016,1,445.      |
| Ni <sub>3</sub> S <sub>2</sub> /NF                   | 223              |                  |                         | <i>J. Am. Chem.Soc.</i> 2015,137,14023.  |
| MoS <sub>2</sub> /Ni <sub>3</sub> S <sub>2</sub>     | 110              |                  | 83                      | <i>Angew. Chem.Int.Ed.</i> 2015,128,6814 |
| h-NiS <sub>x</sub>                                   | 60               | 89               | 99                      | <i>Adv. Energy Mater.</i> 2016,6,1502333 |
| MoO <sub>x</sub> /Ni <sub>3</sub> S <sub>2</sub> /NF | 106              |                  | 90                      | <i>Adv. Funct. Mater.</i> 2016,26,4839.  |
| NiCo <sub>2</sub> S <sub>4</sub> NWS/NF              | 210              |                  | 58.9                    | <i>Adv.Funct.Mater.</i> 2016,26,4661.    |



**Table S3** Comparison of OER activity in alkaline electrolyte (1 M KOH) for NiP<sub>0.62</sub>S<sub>0.38</sub> with other recently published highly active OER electrocatalysts

| Catalyst                                                   | $\eta_{10}$ (mV) | $\eta_{20}$ (mV) | Tafel slope<br>(mV/dec) | Ref.                                                    |
|------------------------------------------------------------|------------------|------------------|-------------------------|---------------------------------------------------------|
| NiP <sub>0.62</sub> S <sub>0.38</sub>                      | 240              | 280              | 46                      | <i>This Work</i>                                        |
| np-(Co <sub>0.52</sub> Fe <sub>0.48</sub> ) <sub>2</sub> P | 270              |                  | 30                      | <i>Energy Environ.Sci.</i> 2016,9,2257                  |
| NiCoP                                                      | 280              |                  | 85                      | <i>Nano Lett.</i> 2016,16,7718                          |
| Co-P film                                                  | 345              |                  | 47                      | <i>Angew.Chem.Int.Ed.</i> 2015,54,6251                  |
| Ni <sub>2</sub> P                                          | 290              |                  | 47                      | <i>Energy Environ. Sci.</i> 2015,8,2347                 |
| Co/CoP-5                                                   | 340              |                  | 79.5                    | <i>Adv.EnergyMater.</i> 2017,10.1002/ae<br>nm.201602355 |
| CP/CTs/Co-S                                                | 306              |                  | 72                      | <i>ACS Nano</i> 2016,10,2342                            |
| Ni <sub>3</sub> Se <sub>2</sub> -GC                        | 310              |                  | 79.5                    | <i>Energy Environ. Sci.</i> 2016, 9, 1771               |
| Mn <sub>3</sub> O <sub>4</sub> /CoSe <sub>2</sub>          | 450              |                  | 49                      | <i>J.Am.Chem.Soc.</i> 2012,134,2930                     |
| NiD-PCC                                                    | 360              |                  | 98                      | <i>Energy Environ. Sci.</i> 2016, 9, 3411               |
| ONPPG/OCC                                                  | 410              |                  | 83                      | <i>Energy Environ. Sci.</i> 2016, 9, 1210               |
| NG-CoO                                                     | 340              |                  | 65                      | <i>Energy Environ. Sci.</i> 2014, 7, 609                |
| Zn <sub>x</sub> Co <sub>3-x</sub> O <sub>4</sub> NWs       | 320              |                  | 51                      | <i>Chem.Mater.</i> 2014,26,1889                         |
| CoCo LDH                                                   | 380              |                  | 59                      | <i>Nat. Commun.</i> 2014,5,4477                         |
| Co <sub>3</sub> O <sub>4</sub> /NG                         | 310              |                  | 67                      | <i>Nat.Mater.</i> 2011,10,780                           |
| CoMn LDH                                                   | 320              |                  | 43                      | <i>J.Am.Chem.Soc.</i> 2014,136,16481                    |

**Table S4** Summary of overall alkaline water splitting performance of recently reported highly efficient bifunctional non-noble electrocatalysts.

| Catalyst                                                                                     | $E_{j=10}$ (mV) | Ref.                                          |
|----------------------------------------------------------------------------------------------|-----------------|-----------------------------------------------|
| $\text{NiP}_{0.62}\text{S}_{0.38}  \text{NiP}_{0.62}\text{S}_{0.38}$                         | 1.52            | <i>This Work</i>                              |
| $(\text{Co}_{0.52}\text{Fe}_{0.48})_2\text{P}  (\text{Co}_{0.52}\text{Fe}_{0.48})_2\text{P}$ | 1.53            | <i>Adv. Energy Mater.</i> 2016, 6, 1502313    |
| $\text{NiCoP}  \text{NiCoP}$                                                                 | 1.58            | <i>Nano Lett.</i> 2016, 16, 7718              |
| $\text{Ni}_{0.51}\text{Co}_{0.49}\text{P}/\text{Ni}_{0.51}\text{Co}_{0.49}\text{P}$          | 1.57            | <i>Adv. Funct. Mater.</i> 2016, 26, 7644.     |
| $\text{Ni}_2\text{P-NF}/\text{Ni}_2\text{P-NF}$                                              | 1.63            | <i>Energy Environ. Sci.</i> 2015, 8, 1027     |
| $\text{CoP-Cu}/\text{CoP-Cu}$                                                                | 1.645           | <i>Angew. Chem. Int. Ed.</i> 2015, 54, 6251   |
| $\text{Ni}_{12}\text{P}_5\text{-NF}/\text{Ni}_{12}\text{P}_5\text{-NF}$                      | 1.64            | <i>ACS Catal.</i> 2015, 7, 103.               |
| $\text{CP@Ni-P}/\text{CP@Ni-P}$                                                              | 1.63            | <i>Adv. Funct. Mater.</i> 2016, 26, 4067      |
| $\text{Ni}_5\text{P}_4/\text{Ni}_5\text{P}_4$                                                | 1.7             | <i>Angew. Chem. Int. Ed.</i> 2015, 54, 12361. |
| $\text{NiCoP-NF}/\text{NiCoP-NF}$                                                            | 1.58            | <i>Nano Lett.</i> 2016, 16, 7718              |
| $\text{CoP-MNA}/\text{CoP-MNA}$                                                              | 1.62            | <i>Adv. Funct. Mater.</i> 2015, 25, 7337      |
| $\text{NiCo}_2\text{S}_4\text{-NF}/\text{NiCo}_2\text{S}_4\text{-NF}$                        | 1.63            | <i>Adv. Funct. Mater.</i> 2016, 26, 4661.     |
| $\text{CoSe}_2\text{-CC}/\text{CoSe}_2\text{-CC}$                                            | 1.63            | <i>Adv. Mater.</i> 2016, 28, 7527             |
| $\text{NiSe-NF}/\text{NiSe-NF}$                                                              | 1.63            | <i>Angew. Chem. Int. Ed.</i> 2015, 54, 9351   |
| $\text{CP-CTS-Co-S}/\text{CP-CTS-Co-S}$                                                      | 1.74            | <i>ACS. Nano</i> 2016, 10, 2342               |
| $\text{FeCoNi-CC}/\text{FeCoNi-CC}$                                                          | 1.66            | <i>ACS Catal.</i> 2017, 7, 469                |
| $\text{VOOH}/\text{VOOH}$                                                                    | 1.62            | <i>Angew. Chem. Int. Ed.</i> 2017, 129, 588   |
| $\text{NiCo}_2\text{O}_4/\text{NiCo}_2\text{O}_4$                                            | 1.65            | <i>Angew. Chem. Int. Ed.</i> 2016, 55, 6290   |
| $\text{NiFe LDH-NF}/\text{NiFe LDH-NF}$                                                      | 1.70            | <i>Science</i> 2014, 345, 1593                |

## Reference

- [1] J. Kibsgaard, C. Tsai, K. Chan, J. D. Benck, J. K. Norskov, F. Abild-Pedersen, T. F. Jaramillo, *Energy Environ. Sci.* 8 (2015) 3022-3029.
- [2] G. Kresse, J. Furthmuller, *Comp. Mater. Sci.* 6 (1996) 15-50.
- [3] G. Kresse, J. Furthmuller, *Phys. Rev. B* 54 (1996) 11169-11186.
- [4] G. Kresse, J. Hafner, *Phys. Rev. B* 49 (1994) 14251-14269.
- [5] J. P. Perdew, K. Burke, M. Ernzerhof, *Phys. Rev. Lett.* 78 (1997) 1396.
- [6] G. Kresse, D. Joubert, *Phys. Rev. B* 59 (1999) 1758-1775.
- [7] P. E. Blochl, *Phys. Rev. B* 50 (1994) 17953-17979.
- [8] H. J. Monkhorst, J. D. Pack, *Phys. Rev. B* 13 (1976) 5188-5192.
- [9] S. J. Grimme, *Comput. Chem.* 27 (2006) 1787-1799.
